# Supplementary material for: Automatic detection of fluorescent droplets for droplet digital PCR: a device capable of processing multiple microscope images
Source: Royal Society of Chemistry journal article supplement (doi:10.1039/d4an01028k), 2024-01-01
Supplement: d4an01028k1.pdf [file d4an01028k1.pdf]

## Supplementary Information

### **Automatic detection of fluorescent droplets for droplet digital PCR: a device capable of processing multiple microscope images**

Kaihao Mao,<sup>ab</sup> Ye Tao,<sup>\*b</sup> Wenshang Guo,<sup>ab</sup> Qisheng Yang,<sup>b</sup> Meiyong Zhao,<sup>ab</sup> Xiangyu Meng,<sup>b</sup> Yinghao Zhang,<sup>b</sup> and Yukun Ren<sup>\*ab</sup>

(\* To whom correspondence should be addressed.)

a. State Key Laboratory of Robotics and System, Harbin Institute of Technology, Harbin 150001, P. R. China

b. School of Mechatronics Engineering, Harbin Institute of Technology, Harbin 150001, P. R. China

**E-mail:** taoyehit@hit.edu.cn (Ye Tao), rykhit@hit.edu.cn (Yukun Ren)

## Table of contents

|                                                                                                          |           |
|----------------------------------------------------------------------------------------------------------|-----------|
| <b>Supplementary Figures</b> .....                                                                       | <b>1</b>  |
| Fig. S1. Microfluidic chip. ....                                                                         | 1         |
| Fig. S2. Image brightness homogenization adjustment algorithm flow chart. ....                           | 2         |
| Fig. S3. Image contrast enhancement effect. ....                                                         | 3         |
| Fig. S4. Image lighting uneven removal effect. ....                                                      | 4         |
| Fig. S5. Inverted microscope image. ....                                                                 | 5         |
| Fig. S6. Self-assembled microscope. ....                                                                 | 6         |
| Fig. S7. Negative droplets have black outlines around the periphery. ....                                | 7         |
| Fig. S9. A-MMD. ....                                                                                     | 9         |
| Fig. S10. The size of the droplets before and after heating. ....                                        | 10        |
| Fig. S11. A comparison of a 50 $\mu\text{m}$ droplet with a 30 $\mu\text{m}$ droplet. ....               | 11        |
| Fig. S12. The recognition results of smaller droplets. ....                                              | 12        |
| <b>Supplementary Tables</b> .....                                                                        | <b>13</b> |
| Table S1. Filtering effect of LSCM images. ....                                                          | 13        |
| Table S2. Filtering effect of inverted microscope images. ....                                           | 13        |
| Table S3. Filtering effect of self-assembled microscope images. ....                                     | 13        |
| Table S4. Image brightness homogenization adjustment data sheet. ....                                    | 14        |
| Table S5. Component parameters of the self-assembled microscope. ....                                    | 15        |
| Table S7. The reaction system of $\lambda$ DNA. ....                                                     | 17        |
| Table S8. Droplets count in LSCM images. ....                                                            | 18        |
| Table S9. Droplets count in inverted microscope images. ....                                             | 19        |
| Table S10. Droplets count in self-assembled microscope images. ....                                      | 20        |
| Table S11. Droplet counts at different template concentrations in LSCM images. ....                      | 21        |
| Table S12. Droplet counts at different template concentrations in inverted microscope images. ....       | 21        |
| Table S13. Droplet counts at different template concentrations in self-assembled microscope images. .... | 22        |
| Table S14. The recognition rate of smaller droplets. ....                                                | 23        |
| Table S15. A comparative evaluation of this work with reported methods. ....                             | 24        |
| <b>Supplementary Notes</b> .....                                                                         | <b>25</b> |
| Note S1. Copy number calculation principle of ddPCR. ....                                                | 25        |
| Note S2. Calculation principle of PSNR. ....                                                             | 26        |
| <b>Supplementary References</b> .....                                                                    | <b>27</b> |

## Supplementary Figures

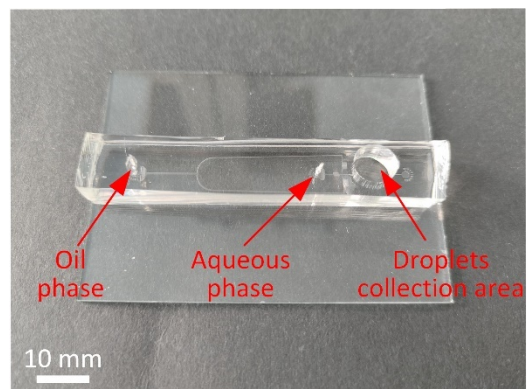

**Fig. S1. Microfluidic chip.**

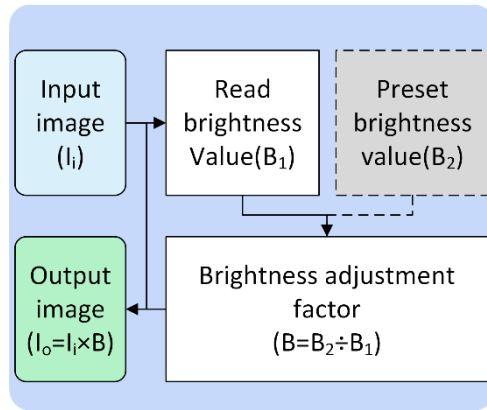

**Fig. S2. Image brightness homogenization adjustment algorithm flow chart.**

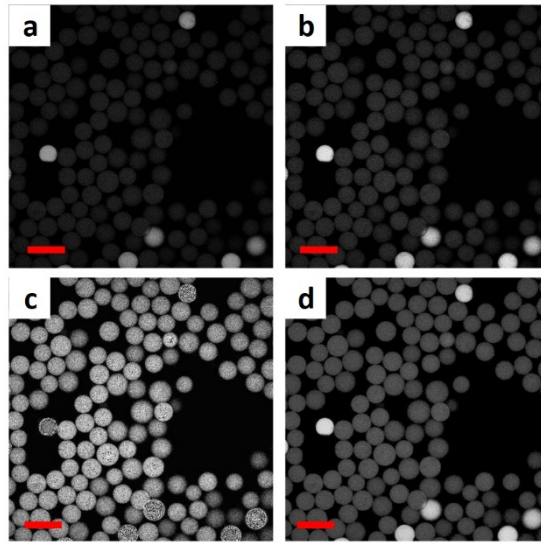

**Fig. S3. Image contrast enhancement effect.** (a) Original image. (b) Histogram normalization method. (c) Linear transformation method. (d) Piecewise linear transformation method. All scale bars represent 90  $\mu\text{m}$ .

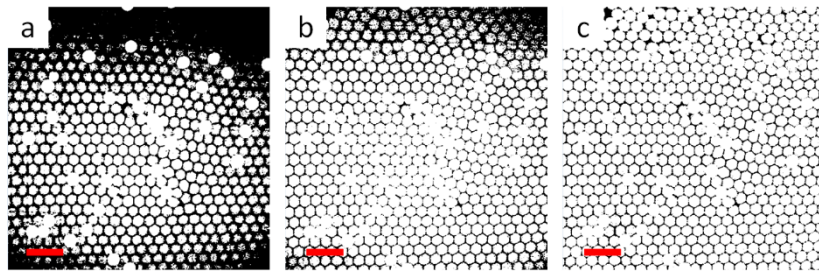

**Fig. S4. Image lighting uneven removal effect.** (a) Original image. (b) Global histogram equalization. (c) CLAHE. All scale bars represent 170  $\mu\text{m}$ .

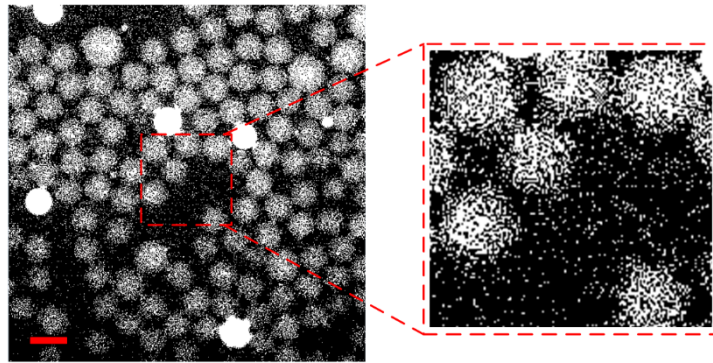

**Fig. S5. Inverted microscope image.** Scale bar represents 60  $\mu\text{m}$ .

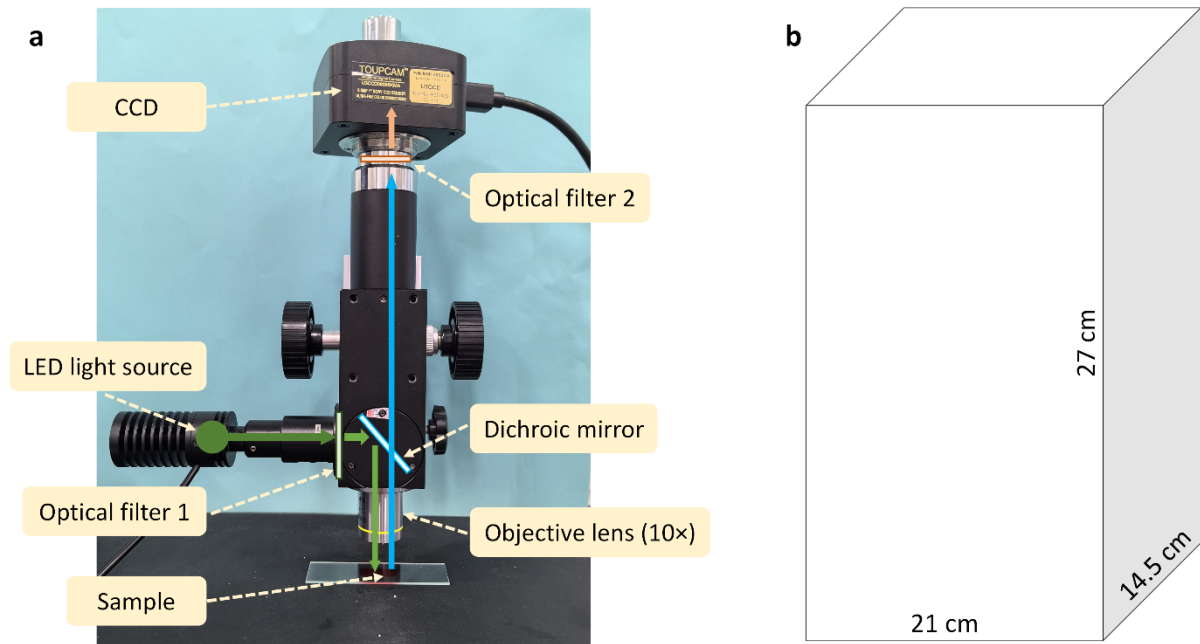

**Fig. S6. Self-assembled microscope. (a) Microscope. (b) Microscope size.**



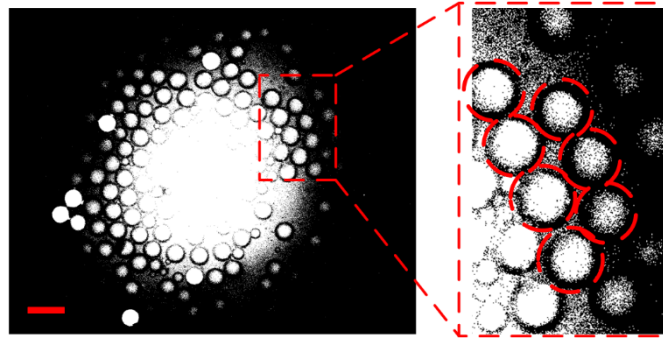

**Fig. S7. Negative droplets have black outlines around the periphery.** Scale bar represents 100  $\mu\text{m}$ .

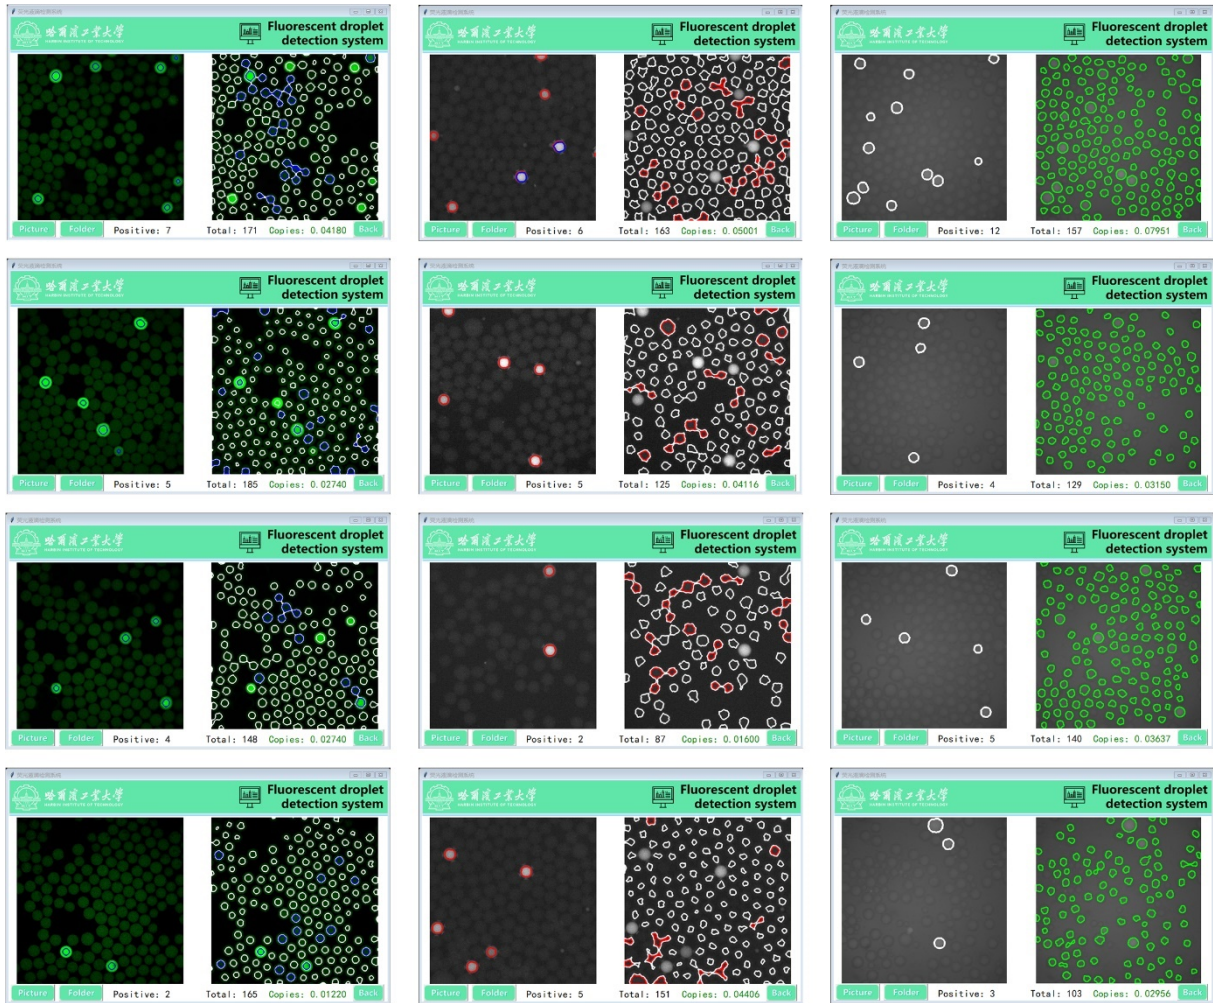

Fig. S8. Individual data analysis of multiple images.

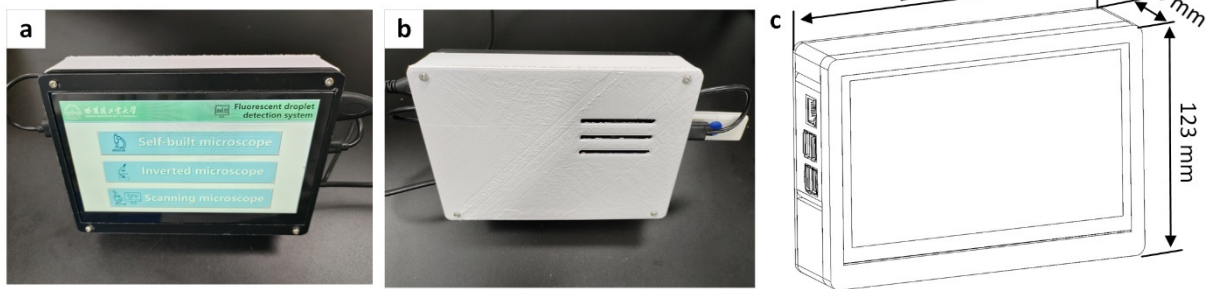

**Fig. S9. A-MMD.** (a) Front view. (b) Rear view. (c) Size.

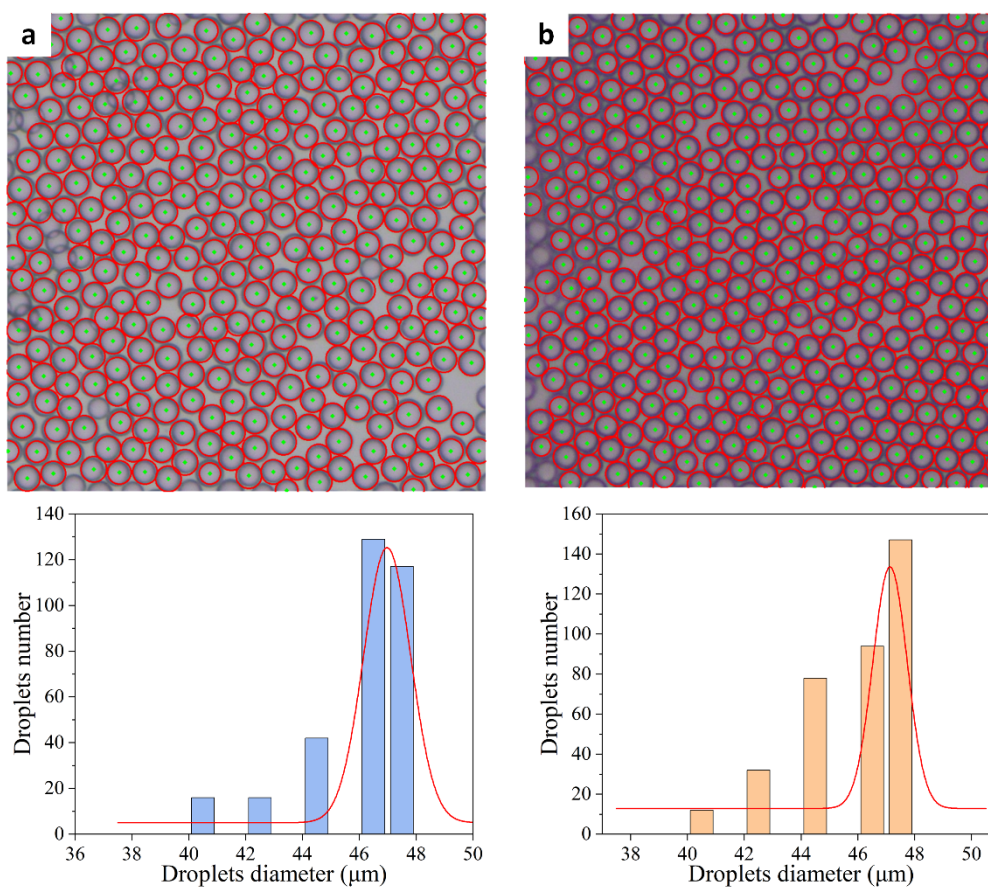

**Fig. S10.** The size of the droplets before and after heating. (a) Before heating. (b) After heating.

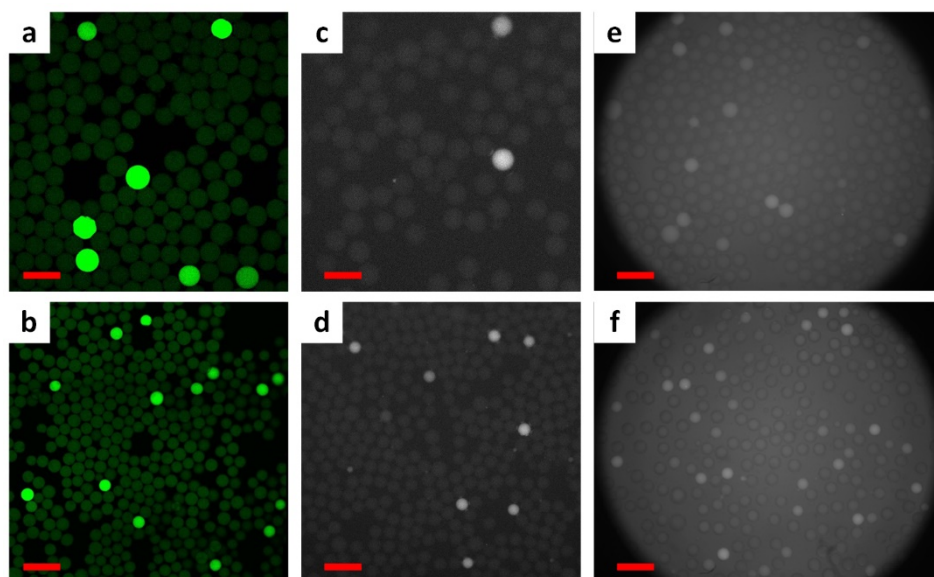

**Fig. S11. A comparison of a 50  $\mu\text{m}$  droplet with a 30  $\mu\text{m}$  droplet.** (a) LSCM image of 50  $\mu\text{m}$  droplet. (b) Inverted microscope image of 50  $\mu\text{m}$  droplet. (c) Self-assembled microscope image of 50  $\mu\text{m}$  droplet. (d) LSCM image of 30  $\mu\text{m}$  droplet. (e) Inverted microscope image of 30  $\mu\text{m}$  droplet. (f) Self-assembled microscope image of 30  $\mu\text{m}$  droplet. The scale bar of (a)-(d) represent 100  $\mu\text{m}$ , the scale bars of (e)-(f) represent 120  $\mu\text{m}$ .

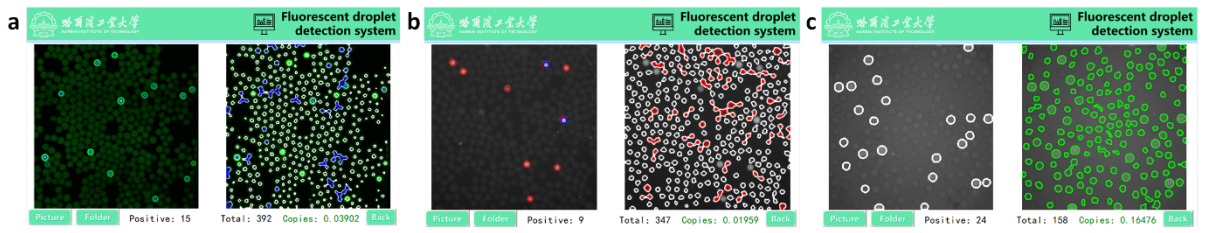

**Fig. S12. The recognition results of smaller droplets.** (a) LSCM image. (b) Inverted microscope image. (c) Self-assembled microscope image.



## Supplementary Tables

**Table S1. Filtering effect of LSCM images.**

| Filter mode        | 3 × 3       | 5 × 5       | 7 × 7       |
|--------------------|-------------|-------------|-------------|
| Mean filtering     | 25.54746476 | 25.64230698 | 25.42120857 |
| Median filtering   | 27.75514209 | 27.63297067 | 27.46685074 |
| Gaussian filtering | 29.65851798 | 28.90407561 | 28.42273793 |

**Table S2. Filtering effect of inverted microscope images.**

| Filter mode        | 3 × 3       | 5 × 5       | 7 × 7       |
|--------------------|-------------|-------------|-------------|
| Mean filtering     | 30.59914329 | 29.84477637 | 29.70253214 |
| Median filtering   | 30.34942059 | 29.74993265 | 29.6950775  |
| Gaussian filtering | 32.47203564 | 31.05732404 | 30.35264612 |

**Table S3. Filtering effect of self-assembled microscope images.**

| Filter mode        | 3 × 3    | 5 × 5    | 7 × 7    |
|--------------------|----------|----------|----------|
| Mean filtering     | 40.80212 | 40.27384 | 40.14111 |
| Median filtering   | 40.58522 | 40.16967 | 40.08713 |
| Gaussian filtering | 41.19436 | 40.7947  | 40.49261 |

**Table S4. Image brightness homogenization adjustment data sheet.**

| Image sample | Before processing | After image processing | Error value | Error rate |
|--------------|-------------------|------------------------|-------------|------------|
| 1            | 28.617679         | 29.754558              | 0.04779     | 0.16%      |
| 2            | 20.974157         | 29.781216              | 0.026658    | 0.09%      |
| 3            | 11.145664         | 29.553978              | 0.227238    | 0.76%      |
| 4            | 22.974354         | 29.754801              | 0.200823    | 0.68%      |
| 5            | 22.454695         | 29.922881              | 0.16808     | 0.56%      |
| 6            | 22.887850         | 29.807311              | 0.11557     | 0.39%      |
| 7            | 22.877641         | 29.786519              | 0.020792    | 0.07%      |
| 8            | 52.477286         | 29.821069              | 0.03455     | 0.12%      |
| 9            | 36.569760         | 29.792437              | 0.028632    | 0.10%      |
| 10           | 29.627339         | 29.654027              | 0.13841     | 0.46%      |

The reference brightness value is 29.802348.



**Table S5. Component parameters of the self-assembled microscope.**

| Part name        | Correlation parameter                                                                                                    |
|------------------|--------------------------------------------------------------------------------------------------------------------------|
| Sample           | Excitation wavelength: 540 nm<br>Emission wavelength: 560 nm                                                             |
| LED light source | Dominant wavelength: 535 nm<br>Half-width: 30 nm<br>Power: 12 W                                                          |
| Optical filter 1 | Band pass filter<br>460-540 nm                                                                                           |
| Optical filter 2 | Long wave pass filter<br>590 nm                                                                                          |
| Dichroic mirror  | Type: long wave pass dichroic mirror<br>Incidence Angle: 45°<br>Reflection band: 500-535 nm<br>Transmittance: 560-750 nm |

**Table S6. Specifications of the A-MMD.**

| Constituent         | Specifications                                    |
|---------------------|---------------------------------------------------|
| Raspberry Pi 5      | Random access memory 4 GB, internal storage 64 GB |
| HDMI display screen | 7 inches, resolution 1024 × 600                   |
| Cooling fan         | DC 5V, 24.5 mm × 24.5 mm × 14 mm                  |
| Device casing       | 3D printing materials PLA                         |

**Table S7. The reaction system of  $\lambda$  DNA.**

| Constituent                           | Volume ( $\mu$ L) |
|---------------------------------------|-------------------|
| Taq enzyme (5 U/ $\mu$ L)             | 0.5               |
| 10X PCR Buffer(Mg <sup>2+</sup> plus) | 5                 |
| dNTP Mixture(each 2.5 mM)             | 4                 |
| $\lambda$ DNA                         | 0.5               |
| 297-R (10 $\mu$ M)                    | 1.5               |
| 297-F (10 $\mu$ M)                    | 1.5               |
| SYTO 82                               | 2.5               |
| DNase/RNase-Free Water                | 34.5              |

**Table S8. Droplets count in LSCM images.**

| Images | Positive droplets | Actual number | Recognition rate | Total droplets | Actual number | Recognition rate |
|--------|-------------------|---------------|------------------|----------------|---------------|------------------|
| 1      | 34                | 34            | 100.00%          | 603            | 609           | 99.01%           |
| 2      | 34                | 34            | 100.00%          | 586            | 590           | 99.32%           |
| 3      | 32                | 32            | 100.00%          | 557            | 558           | 99.82%           |
| 4      | 6                 | 6             | 100.00%          | 148            | 148           | 100.00%          |
| 5      | 5                 | 5             | 100.00%          | 180            | 182           | 98.90%           |
| 6      | 4                 | 4             | 100.00%          | 146            | 146           | 100.00%          |
| 7      | 1                 | 1             | 100.00%          | 78             | 79            | 98.73%           |
| 8      | 7                 | 7             | 100.00%          | 179            | 181           | 98.89%           |
| 9      | 7                 | 7             | 100.00%          | 168            | 170           | 98.82%           |
| 10     | 2                 | 2             | 100.00%          | 125            | 126           | 99.20%           |

The average recognition rate of all droplets is 99.27% and the standard deviation is 0.49%.

**Table S9. Droplets count in inverted microscope images.**

| Images | Positive droplets | Actual number | Recognition rate | Total droplets | Actual number | Recognition rate |
|--------|-------------------|---------------|------------------|----------------|---------------|------------------|
| 1      | 6                 | 6             | 100.00%          | 173            | 176           | 98.30%           |
| 2      | 5                 | 5             | 100.00%          | 157            | 161           | 97.52%           |
| 3      | 3                 | 3             | 100.00%          | 141            | 141           | 100.00%          |
| 4      | 2                 | 2             | 100.00%          | 87             | 87            | 100.00%          |
| 5      | 5                 | 5             | 100.00%          | 148            | 152           | 97.37%           |
| 6      | 5                 | 5             | 100.00%          | 133            | 133           | 100.00%          |
| 7      | 9                 | 9             | 100.00%          | 361            | 361           | 100.00%          |
| 8      | 18                | 18            | 100.00%          | 635            | 640           | 99.22%           |
| 9      | 14                | 14            | 100.00%          | 562            | 574           | 97.91%           |
| 10     | 5                 | 5             | 100.00%          | 145            | 146           | 99.32%           |

The average recognition rate of all droplets is 98.96% and the standard deviation is 1.09%.

**Table S10. Droplets count in self-assembled microscope images.**

| Images | Positive droplets | Actual number | Recognition rate | Total droplets | Actual number | Recognition rate |
|--------|-------------------|---------------|------------------|----------------|---------------|------------------|
| 1      | 11                | 11            | 100.00%          | 163            | 164           | 99.39%           |
| 2      | 4                 | 4             | 100.00%          | 134            | 134           | 100.00%          |
| 3      | 12                | 12            | 100.00%          | 134            | 134           | 100.00%          |
| 4      | 5                 | 5             | 100.00%          | 154            | 154           | 100.00%          |
| 5      | 4                 | 4             | 100.00%          | 112            | 113           | 99.12%           |
| 6      | 3                 | 3             | 100.00%          | 65             | 67            | 97.01%           |
| 7      | 6                 | 6             | 100.00%          | 142            | 145           | 97.93%           |
| 8      | 2                 | 2             | 100.00%          | 49             | 50            | 98.00%           |
| 9      | 2                 | 2             | 100.00%          | 63             | 63            | 100.00%          |
| 10     | 5                 | 5             | 100.00%          | 154            | 155           | 99.35%           |

The average recognition rate of all droplets is 99.08% and the standard deviation is 1.07%.

**Table S11. Droplet counts at different template concentrations in LSCM images.**

| template concentrations | $2 \times 10^2$ copies/ $\mu\text{L}$                                                                                                                                   | $2 \times 10^3$ copies/ $\mu\text{L}$                                                                                                                                     | $2 \times 10^4$ copies/ $\mu\text{L}$                                                                                                                                       |
|-------------------------|-------------------------------------------------------------------------------------------------------------------------------------------------------------------------|---------------------------------------------------------------------------------------------------------------------------------------------------------------------------|-----------------------------------------------------------------------------------------------------------------------------------------------------------------------------|
| Positive droplets       | 0                                                                                                                                                                       | 7                                                                                                                                                                         | 182                                                                                                                                                                         |
| ImageJ                  | 0                                                                                                                                                                       | 7                                                                                                                                                                         | 183                                                                                                                                                                         |
| Recognition rate        | 100.00%                                                                                                                                                                 | 100.00%                                                                                                                                                                   | 99.45%                                                                                                                                                                      |
| Total droplets          | 163                                                                                                                                                                     | 172                                                                                                                                                                       | 182                                                                                                                                                                         |
| ImageJ                  | 165                                                                                                                                                                     | 174                                                                                                                                                                       | 183                                                                                                                                                                         |
| Recognition rate        | 98.79%                                                                                                                                                                  | 98.85%                                                                                                                                                                    | 99.45%                                                                                                                                                                      |
| Image                   | 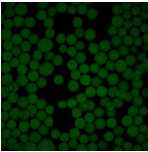<br> | <br> | <br> |

**Table S12. Droplet counts at different template concentrations in inverted microscope images.**

| template concentrations | $2 \times 10^2$ copies/ $\mu\text{L}$                                                                                                                                      | $2 \times 10^3$ copies/ $\mu\text{L}$                                                                                                                                        | $2 \times 10^4$ copies/ $\mu\text{L}$                                                                                                                                          |
|-------------------------|----------------------------------------------------------------------------------------------------------------------------------------------------------------------------|------------------------------------------------------------------------------------------------------------------------------------------------------------------------------|--------------------------------------------------------------------------------------------------------------------------------------------------------------------------------|
| Positive droplets       | 1                                                                                                                                                                          | 5                                                                                                                                                                            | 32                                                                                                                                                                             |
| ImageJ                  | 1                                                                                                                                                                          | 5                                                                                                                                                                            | 33                                                                                                                                                                             |
| Recognition rate        | 100.00%                                                                                                                                                                    | 100.00%                                                                                                                                                                      | 96.97%                                                                                                                                                                         |
| Total droplets          | 137                                                                                                                                                                        | 130                                                                                                                                                                          | 103                                                                                                                                                                            |
| ImageJ                  | 138                                                                                                                                                                        | 130                                                                                                                                                                          | 105                                                                                                                                                                            |
| Recognition rate        | 99.28%                                                                                                                                                                     | 100.00%                                                                                                                                                                      | 98.10%                                                                                                                                                                         |
| Image                   | 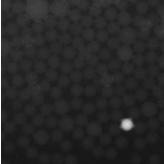<br> | <br> | <br> |

**Table S13. Droplet counts at different template concentrations in self-assembled microscope images.**

| template concentrations | $2 \times 10^2$ copies/ $\mu\text{L}$                                              | $2 \times 10^3$ copies/ $\mu\text{L}$                                               | $2 \times 10^4$ copies/ $\mu\text{L}$                                                |
|-------------------------|------------------------------------------------------------------------------------|-------------------------------------------------------------------------------------|--------------------------------------------------------------------------------------|
| Positive droplets       | 4                                                                                  | 10                                                                                  | 159                                                                                  |
| ImageJ                  | 4                                                                                  | 10                                                                                  | 159                                                                                  |
| Recognition rate        | 100.00%                                                                            | 100.00%                                                                             | 100.00%                                                                              |
| Total droplets          | 112                                                                                | 162                                                                                 | 159                                                                                  |
| ImageJ                  | 113                                                                                | 164                                                                                 | 159                                                                                  |
| Recognition rate        | 99.12%                                                                             | 98.78%                                                                              | 100.00%                                                                              |
| Image                   | 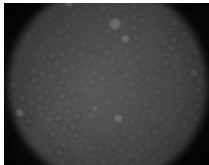  |   |   |
|                         |  |  |  |



**Table S14. The recognition rate of smaller droplets.**

| Type                      | Positive droplets | Actual number | Recognition rate | Total droplets | Actual number | Recognition rate |
|---------------------------|-------------------|---------------|------------------|----------------|---------------|------------------|
| LSCM                      | 15                | 15            | 100.00%          | 392            | 401           | 97.76%           |
| Inverted microscope       | 9                 | 9             | 100.00%          | 347            | 353           | 98.30%           |
| Self-assembled microscope | 24                | 23            | 95.83%           | 158            | 161           | 98.14%           |

**Table S15. A comparative evaluation of this work with reported methods.**

| Methods                                                                                             | Positive recognition rate | Negative recognition rate | Total recognition rate |
|-----------------------------------------------------------------------------------------------------|---------------------------|---------------------------|------------------------|
| This work                                                                                           | 100.00%                   | 99.25%                    | 99.27%                 |
|                                                                                                     | 100.00%                   | 98.93%                    | 98.96%                 |
|                                                                                                     | 100.00%                   | 99.04%                    | 99.08%                 |
| A quantitative image analysis method, Sensors, 2017 <sup>1</sup>                                    | 95.02%                    | -                         | 95.86%                 |
| FluoroCellTrack, PLOS ONE, 2019 <sup>2</sup>                                                        | -                         | -                         | 92–99%                 |
| A deep learning-based high-throughput ddPCR droplet detection framework, Analyst, 2023 <sup>3</sup> | 99.71%                    | 95.04%                    | -                      |

## Supplementary Notes

### Note S1. Copy number calculation principle of ddPCR.

The calculation principle of the copy number in ddPCR is based on the Poisson distribution.<sup>4</sup> Each droplet is a relatively independent area. For a designated droplet, the decision for a DNA molecule to enter this droplet is a binary choice, with entry recorded as 1 and non-entry as 0. Thus, for a specific droplet, if every DNA molecule makes the same choice, the event follows a binomial distribution (S1). Given the large number of droplets and the dilution of DNA molecules to a certain extent, it can be considered that the droplets approach infinity and the DNA molecules approach zero, then the DNA molecules contained in the droplets conform to the Poisson distribution (S2). When it is assumed that no DNA molecules enter the droplet,  $k$  is taken as zero at this point, yielding equation (S3). By taking the logarithm of both sides of equation (S3), the final copy number of the target DNA is obtained (S4).

$$P(x=k)=C_N^k p^k (1-p)^{N-k} \quad (S1)$$

$$p(x=k)=\frac{\lambda^k}{k!} e^{-\lambda} \quad (S2)$$

$$p(x=0)=1-\frac{m}{n}=e^{-\lambda} \quad (S3)$$

$$\lambda=-\ln\left(1-\frac{m}{n}\right) \quad (S4)$$

$k$ : 0 or 1;

$\lambda$ : DNA copy number in the drop;

$d$ : the number of droplets generated;

$x$ : if a destination DNA segment chooses whether to enter a droplet, then the probability of an entry event is  $p=1/d$ ;

$N$ :  $N \times$  events have occurred;

$P$ : the probability that the droplet contains  $k$  DNA molecules;

$m$ : number of positive drops;

$n$ : Total number of drops.

**Note S2. Calculation principle of PSNR.**

Peak Signal-to-Noise Ratio (PSNR) is a measure of the quality of an image after denoising or adding noise, with higher values indicating better filtering effects.<sup>5</sup> In the context of images, it is used to evaluate the quality of two compared images, that is, the degree of distortion; the higher the PSNR, the less image distortion. The calculation formulas are shown as (S5) and (S6): first, calculate the Mean Squared Error (MSE), then calculate the PSNR, where MAX is taken as the maximum grayscale value of 255.

$$MSE = \frac{1}{mn} \sum_{i=0}^{m-1} \sum_{j=0}^{n-1} (I(i,j) - K(i,j))^2 \quad (S5)$$

$$PSNR = 10 * \log_{10} \left( \frac{MAX^2}{MSE} \right) \quad (S6)$$

$I(i, j)$  : original image;

$K(i, j)$  : image after noise removal;

$m, n$ : size of image pixel value.

## Supplementary References

1. R. F. Li, Y. B. Wang, H. Xu, B. W. Fei and B. J. Qin, *Sensors*, 2017, **17**, 13.
2. M. Vaithiyathan, N. Safa and A. T. Melvin, *PLoS One*, 2019, **14**, 22.
3. H. X. Yang, J. H. Yu, L. H. Jin, Y. P. Zhao, Q. Gao, C. R. Shi, L. Ye, D. Li, H. Yu and Y. K. Xu, *Analyst*, 2023, **148**, 239-247.
4. L. B. Pinheiro, V. A. Coleman, C. M. Hindson, J. Herrmann, B. J. Hindson, S. Bhat and K. R. Emslie, *Anal. Chem.*, 2012, **84**, 1003-1011.
5. C. Yim and A. C. Bovik, *IEEE Trans. Image Process.*, 2011, **20**, 88-98.
